# Supplementary material for: A retrospective analysis of eye conditions among children attending St. John Eye Hospital, Hebron, Palestine
Source: BMC Res Notes. 2016 Apr 5;9:202. doi: 10.1186/s13104-016-2011-9 (PMC4822304; doi:10.1186/s13104-016-2011-9)
Supplement: Supplementary file 4 — 10.1186/s13104-016-2011-9 Conditions according to sex. [file 13104_2016_2011_MOESM4_ESM.xlsx]

## Sheet: conditions-sex
Morbidity	Count (%)	Gender		Age Group
		Female	Male	0-5 y	6-10 y	11-15 y
Childhood Blindness	149	78	71	105	32	12		0.167982
Conjunctiva	210	82	128	71	74	65		0.236753
Cornea & Sclera	15	4	11	2	3	10		0.0169109
Diabetic Retinopathy	11	5	6	3	1	7		0.0124014
Lacrimal	54	27	27	47	4	3		0.0608794
Lens	2	0	2	0	1	1		0.00225479
Lid	82	41	41	32	16	34		0.0924464
Miscllaneous	2	2	0	2	0	0		0.00225479
Neuro-ophth diseases	4	2	2	2	0	2		0.00450958
Orbit	7	3	4	6	1	0		0.00789177
Refractive Errors	280	144	136	61	90	129		0.315671
Retina & Vitreous	14	9	5	4	5	5		0.0157835
Trauma/Injury	57	20	37	22	18	17		0.0642616
	887	417	470	357	245	285
		0.470124	0.53	0.40248	0.276212	0.321308
Morbidity	Count (%)	Gender		Age Group
		Female	Male	0-5 y	6-10 y	11-15 y
Childhood Blindness	149 (16.8)	78	71	105	32	12
Conjunctiva	210 (23.7)	82	128	71	74	65
Cornea & Sclera	15 (1.7)	4	11	2	3	10
Diabetic Retinopathy	11 (1.2)	5	6	3	1	7
Lacrimal	54 (6.1)	27	27	47	4	3
Lens	2 (0.2)	0	2	0	1	1
Lid	82 (9.2)	41	41	32	16	34
Miscllaneous	2 (0.2)	2	0	2	0	0
Neuro-ophth diseases	4 (0.5)	2	2	2	0	2
Orbit	7 (0.8)	3	4	6	1	0
Refractive Errors	280 (31.6)	144	136	61	90	129
Retina & Vitreous	14 (1.6)	9	5	4	5	5
Trauma/Injury	57 (6.4)	20	37	22	18	17
Morbidity	Count (%)	Gender		Age Group				Morbidity	Count (%)	Gender		Age Group
		Female	Male	0-5 y	6-10 y	11-15 y				Female	Male	0-5	6-10	11-15
Refractive Errors	280 (31.6)	144	136	61	90	129		Refractive Errors	280 (31.6)	144	136	61	90	129
Conjunctiva	210 (23.7)	82	128	71	74	65		Conjunctiva	210 (23.7)	82	128	71	74	65
Childhood Blindness	148 (16.7)	78	70	104	32	12		Strabismus & Amblyopia	122 (13.8)	65	57	81	29	12
								Congenital Disorders	27 (3.0)	13	14	24	3	0
Lid	82 (9.2)	41	41	32	16	34		Lid	82 (9.2)	41	41	32	16	34
Trauma/Injury	57 (6.4)	20	37	22	18	17		Ocular trauma	57 (6.4)	20	37	22	18	17
Lacrimal	54 (6.1)	27	27	47	4	3		Lacrimal	54 (6.1)	27	27	47	4	3
Cornea & Sclera	15 (1.7)	4	11	2	3	10		Cornea & Sclera	15 (1.7)	4	11	2	3	10
Retina & Vitreous	14 (1.6)	9	5	4	5	5		Retina & Vitreous	14 (1.6)	9	5	4	5	5
Diabetic Retinopathy	11 (1.2)	5	6	3	1	7		Diabetic Retinopathy	11 (1.2)	5	6	3	1	7
Orbit	7 (0.8)	3	4	6	1	0		Orbit	7 (0.8)	3	4	6	1	0
Neuro-ophth diseases	4 (0.5)	2	2	2	0	2		Neuro-ophth diseases	4 (0.5)	2	2	2	0	2
Lens	2 (0.2)	0	2	0	1	1		Lens	2 (0.2)	0	2	0	1	1
Miscllaneous	2 (0.2)	2	0	2	0	0		Miscllaneous	2 (0.2)	2	0	2	0	0
TOTAL	887 (100%)	417 (47%)	470 (53%)	357 (40%)	245 (28%)	285 (32%)		TOTAL	887 (100%)	417 (47%)	470 (53%)	357 (40%)	245 (28%)	285 (32%)
